# Supplementary material for: Novel Biochip Platform for Nucleic Acid Analysis
Source: PubMed Central journal article supplement (PMC3436018; doi:10.3390/s120608100), 2012-06-11
Supplement: sensors-12-08100-s001.pdf [file sensors-12-08100-s001.pdf]

Supplementary Information

## Novel Biochip Platform for Nucleic Acid Analysis. *Sensors* 2012, 12, 8100-8111

Salvatore Pernagallo <sup>1,†</sup>, Giorgio Ventimiglia <sup>2,\*†</sup>, Claudia Cavalluzzo <sup>1</sup>, Enrico Alessi <sup>2</sup>, Hugh Ilyine <sup>1</sup>, Mark Bradley <sup>3</sup> and Juan J. Diaz-Mochon <sup>1,\*</sup>

<sup>1</sup> DestiNA Genomics Ltd, West Mains Road, Edinburgh EH9 3JJ, UK; E-Mails: salvatore.pernagallo@destinagenomics.com (S.P.); claudia@destinagenomics.com (C.C.); hugh@destinagenomics.com (H.I.)

<sup>2</sup> STMicroelectronics, ANALOG. MEMS and SENSORS Group, Healthcare BDU, Stradale Primosole 50, Catania 95121, Italy; E-Mail: enrico.alessi@st.com (E.A.)

<sup>3</sup> School of Chemistry, University of Edinburgh, West Mains Road, Edinburgh EH9 3JJ, UK; E-Mail: mark.bradley@ed.ac.uk (M.B.)

† These authors contributed equally to this work.

\* Authors to whom correspondence should be addressed; E-Mail: giorgio.ventimiglia@st.com (G.V.); juan@destinagenomics.com (J.J.D.M.); Tel.: +39-095-740-4344 (G.V.); +44-0-131-650-4821 (J.J.D.M.).

- 
1. Figure S1. MALDI-TOF mass spectrometry of DestiNA probe 1.
  2. Figure S2. MALDI-TOF mass spectrometry of DestiNA probe 2.
  3. Figure S3. MALDI-TOF mass spectrometry of fluorescein-labelled cytosine.
  4. Table S1. Sequences of synthetic RNA/DNA oligomers.

## MALDI-TOF Spectra

**Figure S1.** MALDI-TOF MS of Probe 1: Amino-peg- AAC AC\_ ATT GTC ACA CTC. Exact Mass: 4,920.04, Molecular Weight: 4,922.79.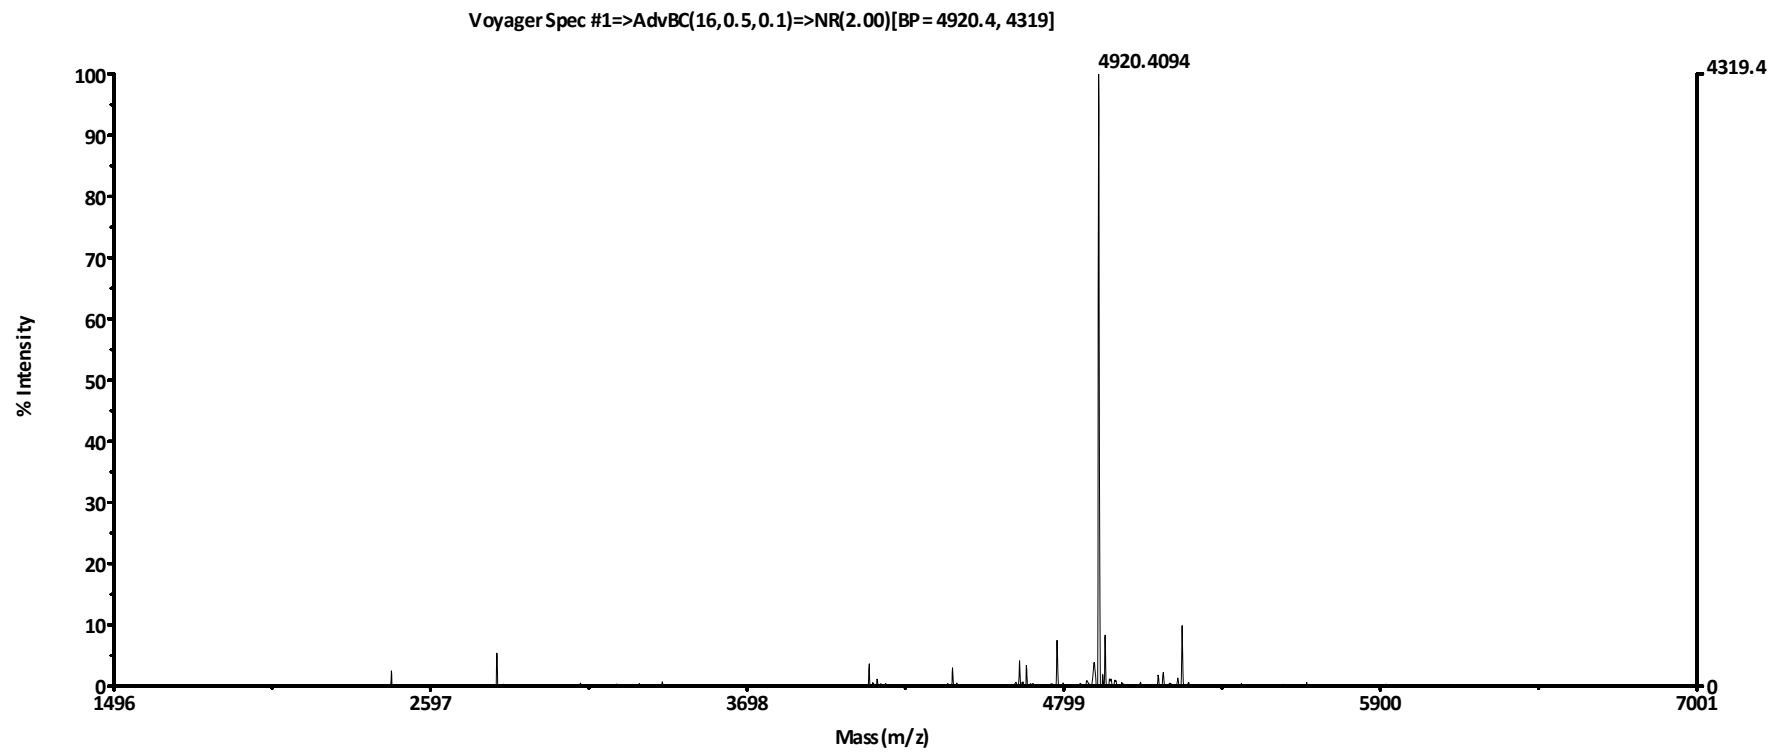

**Figure S2.** MADLI-TOF MS of Probe 2: Amino-peg- GC TTC GGC \_AG TAA TGT GAT. Exact Mass: 5,564.25, Molecular Weight: 5,567.35.

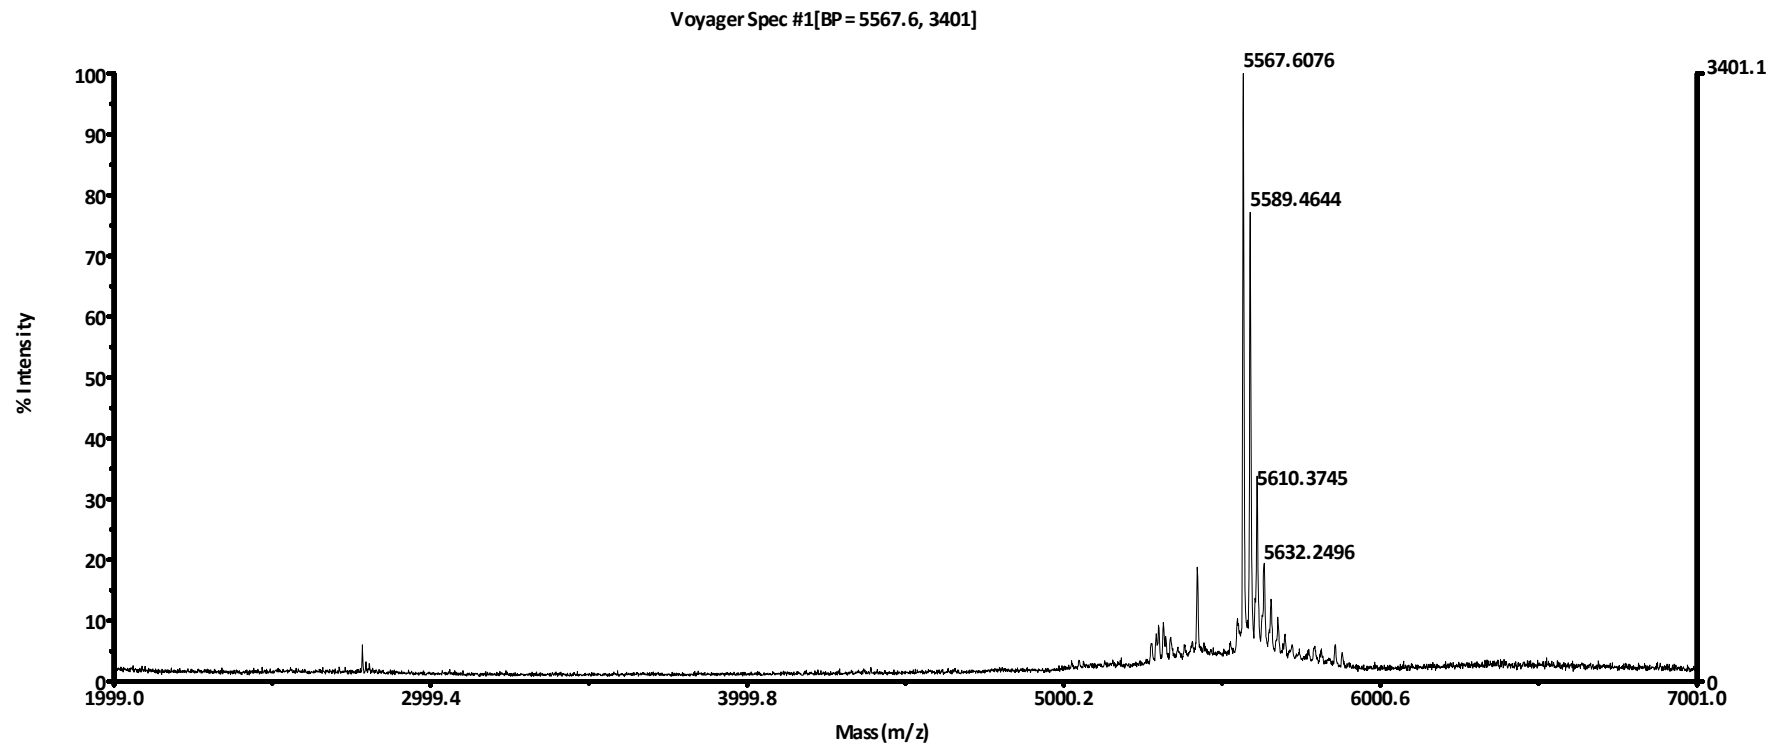

**Figure S3.** MADLI-TOF MS of fluorescein-labelled cytosine. Exact Mass: 563.13, Molecular Weight: 563.41.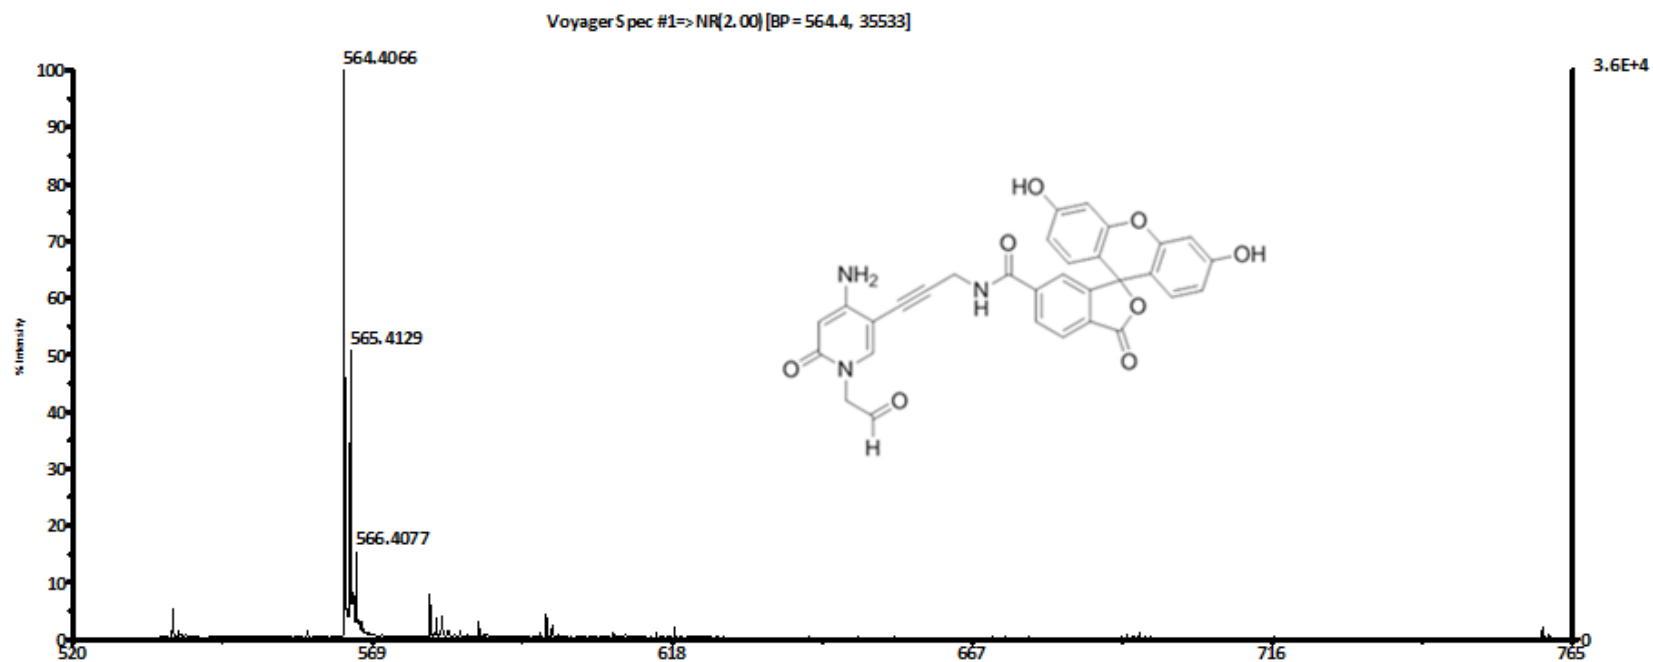**Table S1.** Sequences of synthetic RNA/DNA oligomers.

| Target        | Name     | Sequence (5'→3')     | 5' Modif. | 3' Modif. |
|---------------|----------|----------------------|-----------|-----------|
| 1             | miRNA122 | GAGUGUGACAAUGGUGUU   | FITC      | NONE      |
| 2             | MGV      | AUCACAUUACUGGCCGAAGC | FITC      | NONE      |
| 3             | miRNA122 | GAGUGUGACAAUGGUGUU   | NONE      | NONE      |
| Corner Marker |          | ACTATCATCTAAACT      | Amino C6  | FITC      |
